# Supplementary material for: Zika Virus Non-Structural Protein NS5 Inhibits the RIG-I Pathway and Interferon Lambda 1 Promoter Activation by Targeting IKK Epsilon
Source: MDPI journal article supplement (doi:10.3390/v11111024), 2019-11-04
Supplement: s1 [file s1]

**Table S1.** Primers used in this study. Nucleotide numbering of Zika virus is based on the coding sequence of the isolate.

| Gene    | Primer (5'–3')                           | Amplicon            | Accession  |
|---------|------------------------------------------|---------------------|------------|
| CAP     | Fwd AAAGCGGGATCCAAAAACCCAAAAAAGAAATCC    | 1–375 (375)         | KU365779.1 |
|         | Rev AAAGCGGGATCCTTAGACCTCCGC             |                     |            |
| prM     | Fwd AAAGCGGGATCCACT'AGA'CGT'GGG          | 376–645 (270)       | KU365779.1 |
|         | Rev AAAGCGGGATCCTTATCTTCTAGATCTCCGTGCTTC |                     |            |
| MEM     | Fwd AAAGCGGGATCCGCTGTGACG                | 646–870 (225)       | KU365779.1 |
|         | Rev AAAGCGGGATCCTTAGCTGTATGCCGG          |                     |            |
| ENV     | Fwd AAAGCGGGATCCATCAGGTGC                | 871–2385 (1515)     | KU365779.1 |
|         | Rev AAAGCGGGATCCTTAATCAGCAGAGAC          |                     |            |
| NS1     | Fwd AAAGCGGGATCCGATGTGGGGTGCTCG          | 2482–3537<br>(1056) | KU870645.1 |
|         | Rev AAAGCGGGATCCTTATGCAGTCACCATTG        |                     |            |
| NS2A    | Fwd AAAGCGGGATCCGGATCAACTGATCAC          | 3538–4215 (678)     | KU870645.1 |
|         | Rev AAAGCGGGATCCTTACCGCTTCCCACTCC        |                     |            |
| NS2B    | Fwd AAAGCGGGATCCAGCTGGCCCCCTAG           | 4216–4605 (390)     | KU870645.1 |
|         | Rev AAAGCGGGATCCTTACCT'TTT'TCCAGTC       |                     |            |
| NS3     | Fwd AAAGCGAGATCTAGTGGTGCTCTATGG          | 4606–6456<br>(1851) | KU870645.1 |
|         | Rev AAAGCGAGATCTTTATCTCTTCCCAGCGGC       |                     |            |
| NS4A    | Fwd AAAGCGGGATCCGGAGCGGCTTTTGG           | 6457–6840 (381)     | KU870645.1 |
|         | Rev AAAGCGGGATCCTTATCTTTGCTTTTCTG        |                     |            |
| NS4Ap2K | Fwd AAAGCGGGATCCGGAGCGGCTTTTGG           | 6457–6906 (450)     | KU870645.1 |
|         | Rev AAAGCGGGATCCTTAGGCGGTAATCAAGCC       |                     |            |
| p2KNS4B | Fwd AAAGCGGGATCCTCTCCCCAGGACAACC         | 6841–7659 (822)     | KU870645.1 |
|         | Rev AAAGCGGGATCCTTAACG'TCT'CTT'GAC'C     |                     |            |

|       |     |                                      |                      |            |
|-------|-----|--------------------------------------|----------------------|------------|
| NS4B  | Fwd | AAAGCGGGATCCAATGAACTCGGATGG          | 6907–7659 (753)      | KU870645.1 |
|       | Rev | AAAGCGGGATCCTTAACGTCTCTTGACC         |                      |            |
| NS5   | Fwd | AAAGCGAGATCTGGGGGTGGAACAGG           | 7660–10368<br>(2709) | KU870645.1 |
|       | Rev | AAAGCGAGATCTTTACAGCACTCCAGGTG        |                      |            |
| NS5   | Fwd | AAAGCGAGATCTGGGGGTGGAACAGG           | 7660-8494 (834)      | KU870645.1 |
| MTase | Rev | AAAGCGGGATCCTTAAATGATCTTCATGTTGGG    |                      |            |
| NS5   | Fwd | AAAGCGGGATCCACCATGAAGATCATTGG        | 8485-10368<br>(1884) | KU870645.1 |
| RdRp  | Rev | AAAGCGAGATCTTTACAGCACTCCAGGTG        |                      |            |
| GST   | Fwd | ATAAGATCTACCATGTCCCCTATACTAGGTTATIGG |                      | U13850.1   |
|       | Rev | TATAGATCTGGATCCGATCCACGCGGAACC       |                      |            |
