# Supplementary material for: Zika Virus Non-Structural Protein NS5 Inhibits the RIG-I Pathway and Interferon Lambda 1 Promoter Activation by Targeting IKK Epsilon
Source: MDPI journal article supplement (doi:10.3390/v11111024), 2019-11-04
Supplement: s1 [file s1]

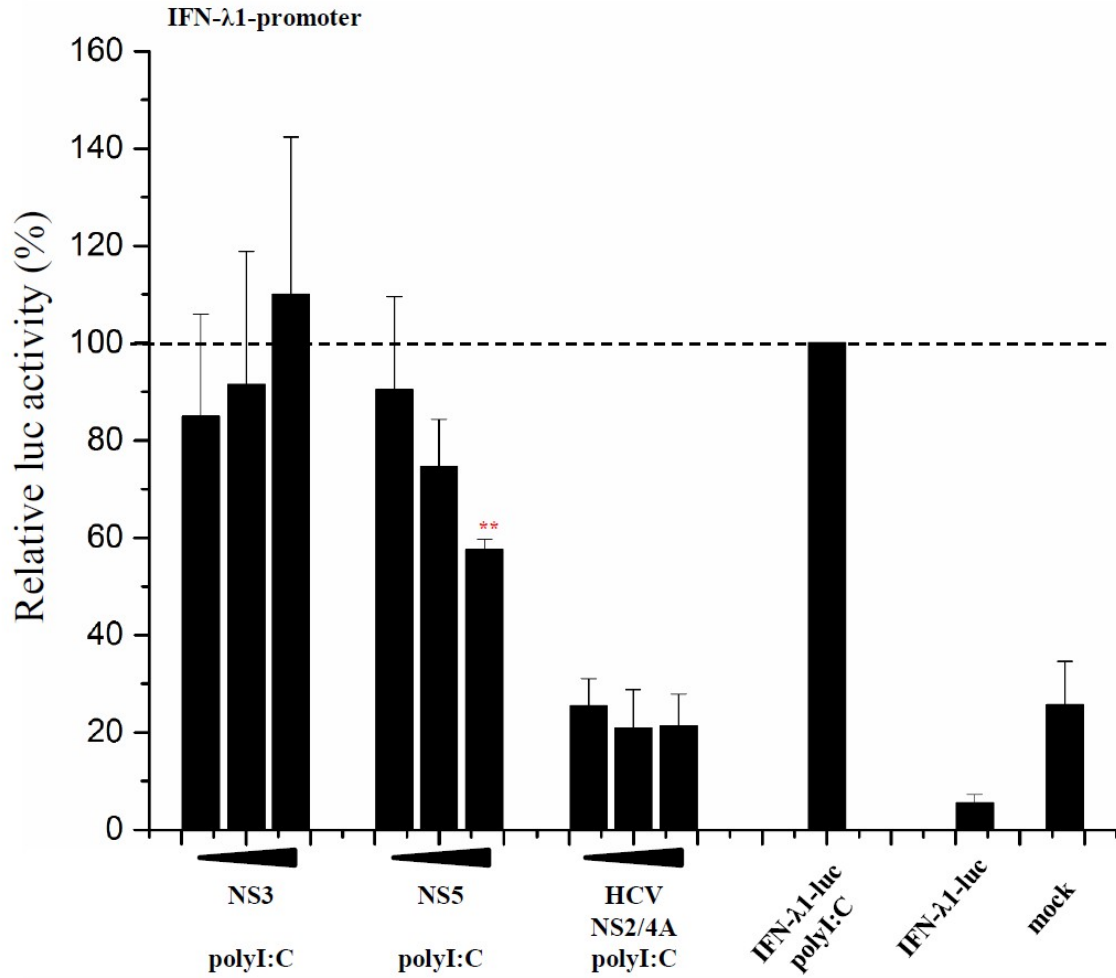

**Figure S2.** ZIKV NS5 inhibits polyI:C induced activation of IFN-λ1 promoter. PolyI:C is dsRNA that activates the RIG-I pathway. To verify the inhibitory effect of ZIKV NS5 on polyI:C-induced pathway, HEK293 cells were co-transfected with IFN-λ-promoter-luciferase reporter plasmids together with increasing amounts (3, 10 and 30 ng/well) of expression plasmids for ZIKV NS3, ZIKV NS5, and HCV NS3/4A proteins. After overnight incubation, the cells were stimulated with polyI:C for overnight and luciferase activities were measured. Results of two independent experiment were combined and luciferase activity induced by the positive control was set to 100%. \*\* indicate a significant reduction in promoter activation ( $p < 0.05$ ).
