# Supplementary material for: Zika Virus Non-Structural Protein NS5 Inhibits the RIG-I Pathway and Interferon Lambda 1 Promoter Activation by Targeting IKK Epsilon
Source: MDPI journal article supplement (doi:10.3390/v11111024), 2019-11-04
Supplement: s1 [file s1]

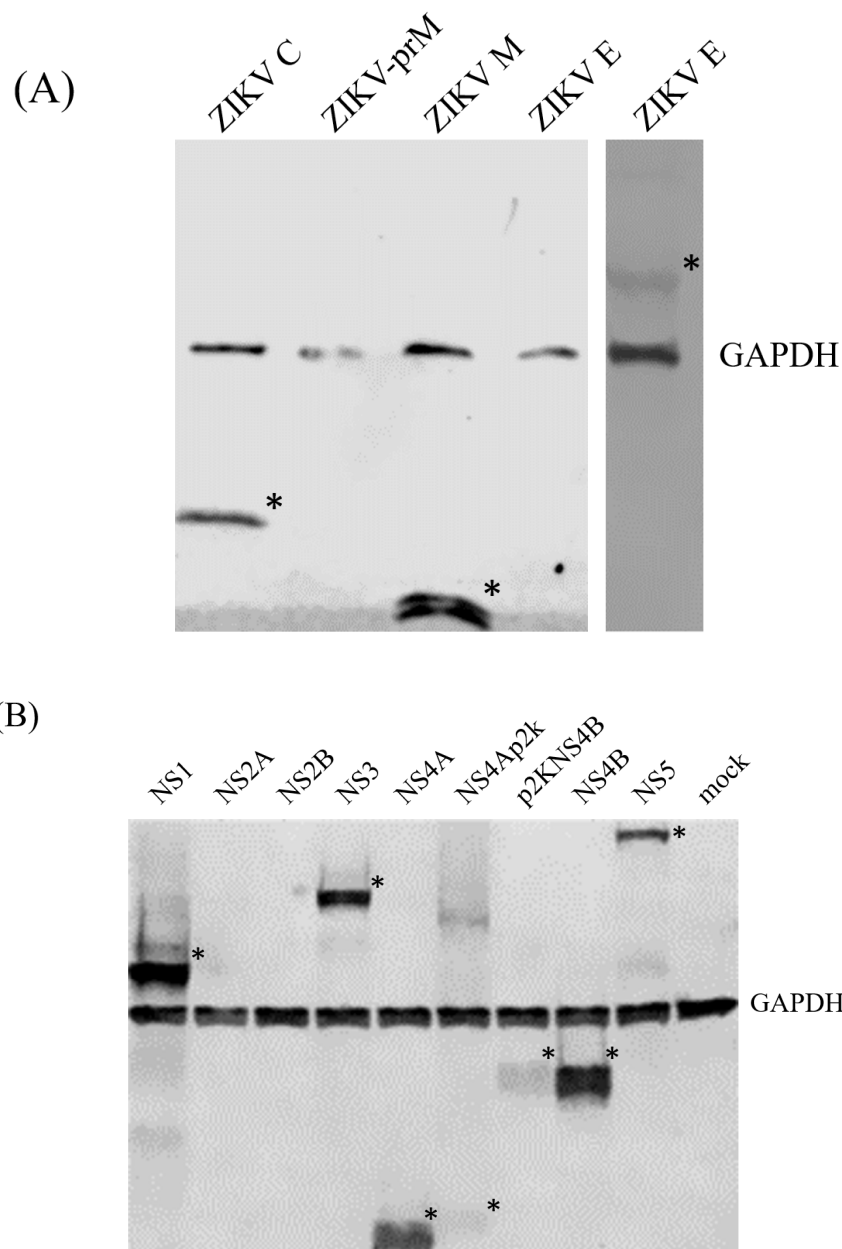

**Figure S1.** Immunoblots of whole cell lysates from HEK293 cells. HEK293 cells were transfected with 2400 ng of ZIKV expression plasmids on 12-well plates and incubated overnight. Expressed ZIKV proteins were detected with  $\alpha$ -HA antibody, and GAPGH (37 kDa) was used as a loading control. **(A)** Two of the four structural HA-tagged proteins ZIKV-C (13.6 kDa), -prM (10.3 kDa), -M (8.48 kDa) and -E (54.5 kDa) were detected in immunoblot in reduced conditions (marked with an asterisk). ZIKV-E protein was detected under non-reducing conditions (right panel). **(B)** Seven of the nine non-structural proteins ZIKV-NS1 (40 kDa), -NS2A (24 kDa), -NS2B (13.8 kDa), -NS3 (68.5 kDa), -NS4A (13.7 kDa), -NS4Ap2K (16.1 kDa), -p2KNS4B (29.4 kDa), -NS4B (27.2 kDa), and -NS5 (102.9 kDa) were detected in immunoblot under reducing conditions (marked with an asterisk). Images are representative of at least three repetitions.
